# Supplementary material for: Immunoglobulin G (IgG) and IgG subclass reference intervals in children, using Optilite® reagents
Source: publisher site journal article supplement (doi:10.1515/cclm-2018-0001), 2018-04-12
Supplement: Supplementary file 1 [file Supplementary table S1 - CCLM.2018.0001.doc]

SUPPLEMENTARY DATA

| **Supplementary Table S1.**  Aggregated age-partitions according to Harris and Boyd’s test (14,18). Lower and upper reference limits and the corresponding 90% confidence intervals (CIs) are presented for immunoglobulin G (IgG) and IgG subclasses. | | | | |
| --- | --- | --- | --- | --- |
| **Age group and analyte** | **Patients**  **(n=)** | **Median**  **(g/L)** | **Lower reference limit [90%CI]**  **(g/L)** | **Upper reference limit [90%CI]**  **(g/L)** |
| ***IgG*** |  | | | |
| **6 to 12 months** | 38 | 4,16 | 1,90 [1,44-2,41] | 6,78 [6,10-7,41] |
| **12 to 24 months** | 47 | 5,74 | 2,83 [2,32-3,41] | 8,79 [8,09-9,44] |
| **2 to 4 years** | 74 | 6,91 | 3,30 [2,73-3,87] | 10,58 [9,88-11,20] |
| **4 to 12 years** | 215 | 8,66 | 5,00 [4,58-5,20] | 14,40 [12,90-17,04] |
| **12 to 18 years** | 80 | 9,99 | 6,31 [5,85-6,83] | 14,97 [14,10-15,80] |
|  |  | | | |
| ***IgG1*** |  |  |  |  |
| **6 to 12 months** | 37 | 2,62 | 1,33 [1,14-1,59] | 4,28 [3,80-4,72] |
| **12 to 24 months** | 47 | 3,59 | 1,19 [0,78-1,59] | 5,95 [5,35-6,55] |
| **2 to 4 years** | 73 | 4,18 | 1,85 [1,53-2,25] | 6,68 [6,23-7,09] |
| **4 to 18 years** | 295 | 5,23 | 2,94 [2,56-3,20] | 9,00 [8,56-10,40] |
|  |  | | | |
| ***IgG2*** |  |  |  |  |
| **6 to 12 months** | 38 | 0,58 | 0,30 [0,26-0,34] | 1,29 [1,04-1,58] |
| **12 to 24 months** | 47 | 0,81 | 0,40 [0,35-0,46] | 1,65 [1,42-1,90] |
| **2 to 3 years** | 47 | 1,08 | 0,46 [0,38-0,56] | 2,42 [2,02-2,85] |
| **3 to 6 years** | 93 | 1,47 | 0,68 [0,60-0,76] | 2,80 [2,54-3,06] |
| **6 to 9 years** | 82 | 1,73 | 0,79 [0,68-0,92] | 3,28 [2,98-3,57] |
| **9 to 12 years** | 66 | 1,96 | 0,88 [0,75-1,05] | 4,07 [3,61-4,52] |
| **12 to 18 years** | 80 | 2,94 | 1,39 [1,21-1,58] | 5,31 [4,85-5,77] |
|  |  |  |  |  |
| ***IgG3*** |  |  |  |  |
| **6 months to 6 years** | 226 | 0,43 | 0,17 [0,13-0,20] | 1,00 [0,83-1,13] |
| **6 to 18 years** | 226 | 0,55 | 0,18 [0,16-0,23] | 1,40 [1,30-1,75] |
|  |  |  |  |  |
| ***IgG4*** |  |  |  |  |
| **6 to 24 months** | 84 | 0,02 | 0,009 [0,008-0,010] | 0,21 [0,12-0,38] |
| **2 to 4 years** | 74 | 0,09 | 0,012 [0,008-0,017] | 0,70 [0,51-0,94] |
| **4 to 18 years** | 294 | 0,25 | 0,023 [0,016-0,030] | 1,17 [0,90-1,42] |
